# Supplementary material for: Virtual Reality for Health Professions Education: Systematic Review and Meta-Analysis by the Digital Health Education Collaboration
Source: PubMed Central journal article supplement (PMC6362387; doi:10.2196/12959), 2019-01-22
Supplement: jmir_v21i1e12959_app2.pdf [file jmir_v21i1e12959_app2.pdf]

## Multimedia Appendix 2: Characteristics of included studies.

| Authors, design, country                        | Number of participants | Type of comparison                                                    | VR <sup>a</sup> type          | Setting, funding                             | Type of participants (pre- or postregistration)                                               | Learning objectives                                                                                                                                                    |
|-------------------------------------------------|------------------------|-----------------------------------------------------------------------|-------------------------------|----------------------------------------------|-----------------------------------------------------------------------------------------------|------------------------------------------------------------------------------------------------------------------------------------------------------------------------|
| Bindoff 2014 [24], RCT <sup>b</sup> , Australia | 33                     | VR versus traditional (paper-based approach)                          | VP/VHP <sup>c</sup> within VR | University, nonindustrial funding            | Third- and fourth-year pharmacy students (preregistration)                                    | To improve pharmacy students' knowledge, skills, and attitude regarding community pharmacy practice                                                                    |
| Claman 2015 [25], RCT, USA                      | 21                     | VR versus online/computer-based learning (blackboard online platform) | VP/VHP within VR              | University, nonindustrial funding            | Family nurse practitioner students (preregistration)                                          | To improve nursing students' attitude toward the VP/VHP within VR                                                                                                      |
| Drapkin 2015 [26], RCT, USA                     | 62                     | VR versus VR (3D <sup>d</sup> models)                                 | 3D models                     | University, N/A <sup>e</sup>                 | First-year medical students (preregistration)                                                 | To improve medical students' knowledge to identify subcortical structures on magnetic resonance images as well as to assess medical students' satisfaction with the VR |
| Farra 2013 [27], RCT, USA                       | 47                     | VR versus other digital education (Web-based teaching method)         | VP/VHP within VR              | University, industry, and public sponsorship | Nursing students in their final year of study (preregistration)                               | To improve nursing students' knowledge regarding disaster training                                                                                                     |
| Fritz 2011 [28], RCT, Canada                    | 62                     | VR versus other digital education (2D images)                         | 3D models                     | University, nonindustrial funding            | Medicine students from year 1 to 4, dentistry and physical therapy students (preregistration) | To improve students' knowledge on laryngeal anatomy at short-term as well as to assess long-term knowledge retention                                                   |
| Halfer 2014 [29], RCT, USA                      | 30                     | VR versus traditional (paper-based approach)                          | Virtual world                 | Hospital, N/A                                | Registered nurses (postregistration)                                                          | To improve nurses' navigation skills within a hospital (wayfinding through a hospital)                                                                                 |
| Hampton 2010 [30],                              | 43                     | VR (blended)                                                          | 3D models                     | University, industry, and                    | Third- and fourth-year medical students                                                       | To improve medical students' knowledge on                                                                                                                              |

|                                |     |                                                              |                        |                                              |                                                                                                       |                                                                                                                                                          |
|--------------------------------|-----|--------------------------------------------------------------|------------------------|----------------------------------------------|-------------------------------------------------------------------------------------------------------|----------------------------------------------------------------------------------------------------------------------------------------------------------|
| RCT, USA                       |     | versus traditional (learning via lectures)                   |                        | public sponsorship                           | (preregistration)                                                                                     | female pelvic anatomy as well as to assess attitude toward VR intervention                                                                               |
| Hampton 2010a [31], RCT, USA   | 23  | VR versus traditional (learning via lectures)                | 3D models              | University, industry, and public sponsorship | Obstetrics/gynecology residents (postregistration)                                                    | To improve residents' knowledge on female pelvic anatomy and to assess attitude toward VR intervention                                                   |
| Hu 2016 [32], RCT, USA         | 100 | VR versus traditional (written text)                         | 3D models              | University, no funding received              | Medical students (preregistration)                                                                    | To improve medical students' knowledge on laryngeal anatomy as well as to assess medical residents' satisfaction with the intervention outcome           |
| Hung 2015 [33], RCT, Hong Kong | 50  | VR versus traditional (usual training)                       | VP/VHP within VR       | University, N/A                              | Registered nurses, enrolled nurses, and health care assistants at OPD <sup>f</sup> (postregistration) | To improve participants' skills regarding the use of personal protective equipment as well as to assess participants' satisfaction with the intervention |
| Kalet 2012 [34], RCT, USA      | 143 | VR versus VR (3D models)                                     | 3D models              | University, nonindustrial funding            | Second-year medical students (preregistration)                                                        | To improve medical students' knowledge and skill on abdominal examination                                                                                |
| Keedy 2011 [35], RCT, USA      | 46  | VR versus other digital education (computer-based 2D images) | 3D models              | University, N/A                              | First- and fourth-year medical students (preregistration)                                             | To improve medical students' knowledge on liver anatomy as well as to assess medical students' satisfaction outcome with VR intervention                 |
| Khatib 2014 [36], RCT, UK      | 56  | VR versus traditional (textbooks)                            | VR surgical simulation | University, nonindustrial funding            | Medical students in their clinical years (preregistration)                                            | To improve medical students' knowledge and skills with inguinal hernia repair simulation                                                                 |
| Kockro 2015 [37], RCT, Germany | 169 | VR versus other digital education (2D <sup>g</sup> )         | 3D models              | University, nonindustrial funding            | Second-year medical students (preregistration)                                                        | To improve medical students' knowledge on neuroanatomy and to assess satisfaction with                                                                   |

|                                 |     |                                                             |                  |                                   |                                                             |                                                                                                                                                                                    |
|---------------------------------|-----|-------------------------------------------------------------|------------------|-----------------------------------|-------------------------------------------------------------|------------------------------------------------------------------------------------------------------------------------------------------------------------------------------------|
|                                 |     | images)                                                     |                  |                                   |                                                             | VR intervention                                                                                                                                                                    |
| Kron 2017 [38], RCT, USA        | 435 | VR versus other digital education (computer-based learning) | 3D models        | University, industrial funding    | Second-year medical students (preregistration)              | To improve communication skills of the medical students as well as to assess attitude toward the intervention outcome                                                              |
| LeFlore 2012 [39], RCT, USA     | 93  | VR versus traditional (learning via lectures)               | VP/VHP within VR | Hospital, N/A                     | Undergraduate registered nursing students (preregistration) | To improve nursing students' knowledge and skills regarding pediatric respiratory diseases                                                                                         |
| Menzel 2014 [40], RCT, USA      | 51  | VR versus other digital education (Web-based learning)      | VP/VHP within VR | University, nonindustrial funding | Nursing students (preregistration)                          | To improve nursing students' attitude toward poverty (simulation in VR environment)                                                                                                |
| Metzler 2012 [41], RCT, Germany | 94  | VR versus other digital education (2D images)               | 3D models        | University, N/A                   | Fourth- and fifth-year medical students (preregistration)   | To improve medical students' knowledge on liver anatomy                                                                                                                            |
| Niazi 2013 [42], RCT, Canada    | 16  | VR versus VR (3D models)                                    | 3D models        | University, industrial funding    | Anesthesia residents (postregistration)                     | To improve residents' knowledge on lumbar anatomy and to improve skills regarding lumbar puncture                                                                                  |
| Nicholson 2006 [11], RCT, USA   | 61  | VR versus other digital education (Web-based tutorial)      | 3D models        | University, nonindustrial funding | First-year medical students (preregistration)               | To improve medical students' knowledge on ear anatomy                                                                                                                              |
| Patel 2012 [43], RCT, UK        | 60  | VR versus traditional (no further training)                 | VP/VHP within VR | University, nonindustrial funding | First-year medical students (preregistration)               | To improve medical students' knowledge and skills outcomes regarding performance in the operating theatre as well as to assess medical students' attitude toward operating theatre |
| Prinz 2005 [44], RCT, UK        | 172 | VR versus other digital education                           | 3D models        | University, N/A                   | Medical students (preregistration)                          | To improve medical students' knowledge and attitude on                                                                                                                             |

|                                  |     |                                                       |                        |                                   |                                                                                                                                                |                                                                                                                                   |
|----------------------------------|-----|-------------------------------------------------------|------------------------|-----------------------------------|------------------------------------------------------------------------------------------------------------------------------------------------|-----------------------------------------------------------------------------------------------------------------------------------|
|                                  |     | (computer-based video)                                |                        |                                   |                                                                                                                                                | ophthalmology                                                                                                                     |
| Rae 2015 [45], RCT, UK           | 32  | VR versus traditional (learning via textbooks)        | VR surgical simulation | University, nonindustrial funding | Foundation doctor trainees and core surgical trainees (postregistration)                                                                       | To improve medical doctors' knowledge and skills with inguinal hernia repair simulation                                           |
| Richardson 2013 [46], RCT, USA   | 89  | VR versus other digital education (2D images)         | 3D models              | University, nonindustrial funding | Second-year students enrolled in a 4-year masters of pharmacy program (postregistration)                                                       | To improve pharmacy students' knowledge on pharmacology and attitude toward the VR intervention                                   |
| Sharma 2013 [47], RCT, UK        | 28  | VR versus traditional (learning via textbooks)        | 3D models              | Hospital, no funding received     | Anesthetic trainees (specialty training year 4 to year 6; postregistration)                                                                    | To improve anesthetic trainees' knowledge on transoesophageal echocardiography                                                    |
| Succar 2013 [48], RCT, Australia | 188 | VR versus traditional (usual learning)                | VP/VHP within VR       | University, nonindustrial funding | Medical students (preregistration)                                                                                                             | To improve medical students' knowledge and satisfaction outcome on ophthalmology training in VR                                   |
| Szumacher 2009 [49], RCT, Canada | 31  | VR versus VR (3D models)                              | 3D models              | University, N/A                   | Radiation oncology residents and fellows as well as third-year radiotherapy students and radiation therapists (both pre- and postregistration) | To improve participants' skills and satisfaction with radiology training (prostate and rectal contouring)                         |
| Tan 2012 [50], RCT, Canada       | 40  | VR versus other digital education (2D images)         | 3D models              | University, N/A                   | First- and second-year surgical and anesthesia medical residents (postregistration)                                                            | To improve participants' knowledge and attitude outcomes in laryngeal anatomy                                                     |
| West 2015 [51], RCT, Denmark     | 22  | VR versus VR (nontutored computer simulation program) | 3D models              | University, N/A                   | Medical students (preregistration)                                                                                                             | To improve medical students' knowledge in temporal bone anatomy                                                                   |
| Yeung 2012 [52], RCT, UK         | 78  | VR versus traditional (learning via textbook)         | 3D models              | University, N/A                   | Second-year students from health science course in anatomy and physiology (preregistration)                                                    | To improve participants' knowledge in cranial nerve anatomy as well as to improve participants' satisfaction with VR intervention |
| Zaveri 2016                      | 32  | VR versus                                             | VP/VHP                 | Hospital,                         | Pediatrics residents                                                                                                                           | To improve pediatrics                                                                                                             |

|                   |  |                                                   |           |                          |                    |                                                                                        |
|-------------------|--|---------------------------------------------------|-----------|--------------------------|--------------------|----------------------------------------------------------------------------------------|
| [53], RCT,<br>USA |  | other digital<br>education<br>(online<br>sources) | within VR | nonindustrial<br>funding | (postregistration) | residents' knowledge,<br>skill, and satisfaction<br>outcome with pediatric<br>sedation |
|-------------------|--|---------------------------------------------------|-----------|--------------------------|--------------------|----------------------------------------------------------------------------------------|

<sup>a</sup>VR: virtual reality.

<sup>b</sup>RCT: randomized controlled trials.

<sup>c</sup>VP/VHP: virtual patient/virtual health professionals.

<sup>d</sup>3D: three-dimensional.

<sup>e</sup>N/A: not available.

<sup>f</sup>OPD: out patient department.

<sup>g</sup>2D: two-dimensional.
